# Supplementary material
Source: publisher figshare collection journal article supplement (https://asha.figshare.com/articles/dataset/_/23303987)
Supplement: Supplementary file 1 [file 1]

**Supplemental Material S1.** Semantic similarity ratings within stimuli quartets.

|           |          |       |          |        |
|-----------|----------|-------|----------|--------|
| Quartet 1 | Pants    | Boots | Cereal   | Toast  |
|           | Pants    | 0.323 | 0        | 0      |
|           | Boots    |       | 0        | 0      |
|           | Cereal   |       |          | 0.374  |
|           | Toast    |       |          |        |
| Quartet 2 | Shirt    | Hat   | Crackers | Pizza  |
|           | Shirt    | 0.571 | 0        | 0      |
|           | Hat      |       | 0        | 0      |
|           | Crackers |       |          | 0.2382 |
|           | Pizza    |       |          |        |
| Quartet 3 | Airplane | Truck | Bread    | Cheese |
|           | Airplane | 0.226 | 0        | 0      |
|           | Truck    |       | 0        | 0      |
|           | Bread    |       |          | 0.444  |
|           | Cheese   |       |          |        |
| Quartet 4 | Monkey   | Lion  | Bus      | Train  |
|           | Monkey   | 0.359 | 0.096    | 0.037  |
|           | Lion     |       | 0.061    | 0.017  |
|           | Bus      |       |          | 0.384  |
|           | Train    |       |          |        |
